# Supplementary material
Source: publisher figshare collection journal article supplement (https://acs.figshare.com/ndownloader/files/12739415)
Supplement: Supplementary file 1 [file 12739415]

*Supporting Information*  
*for*  
**Perpendicular Alignment and Selective Swelling-Induced  
Generation of Homopores of Polystyrene-*b*-poly  
(2-vinylpyridine)-*b*-poly (ethylene oxide) Triblock Terpolymer**

*Leiming Guo,<sup>†</sup> Zhaogen Wang, and Yong Wang\**

State Key Laboratory of Materials-Oriented Chemical Engineering, Jiangsu  
National Synergetic Innovation Center for Advanced Materials, and College of  
Chemical Engineering, Nanjing Tech University, 210009 Nanjing, Jiangsu,  
China

<sup>†</sup> Present address: Institut für Chemie neuer Materialien, Universität  
Osnabrück, Barbarastr. 7, 49069 Osnabrück, Germany

\*Corresponding author

E-mail: yongwang@njtech.edu.cn

Tel: 0086-25-8317 2247

Fax: 0086-25-8317 2292

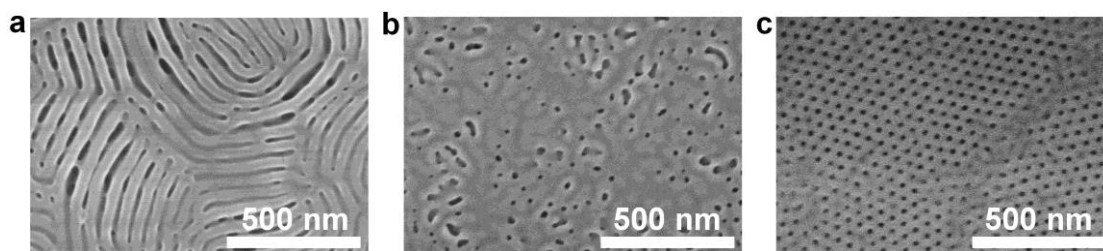

**Figure S1.** SEM surface images of the annealed SPO/PS films ( $D=2.1$ ) subjected to ethanol swelling at 50 °C for 0.5 h. The volume fractions of PS are 68% (a), 72% (b) and 80% (c) by blending PS homopolymers in the films. Here, the ethanol swelling was mildly used to generate nanopores for evaluating the morphology changes of the annealed films.<sup>1</sup>

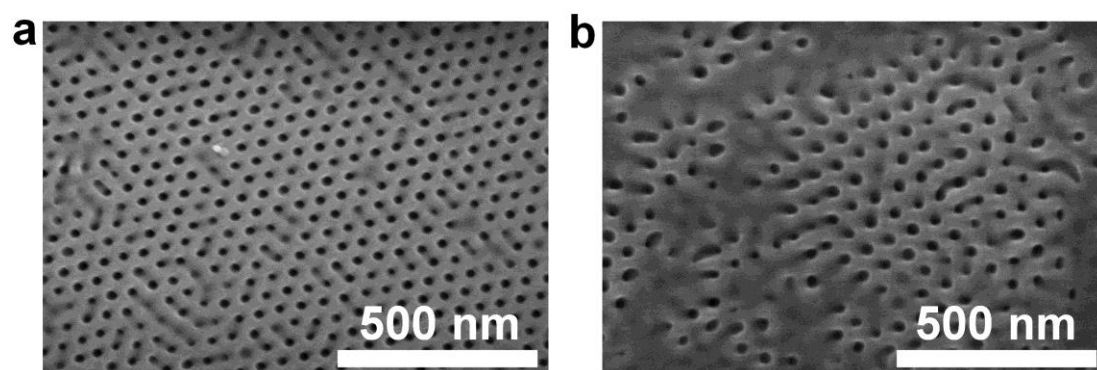

**Figure S2.** SEM surface images of the SPO/PS films annealed under a humidity of 70% (a) and 80% (b) at 25 °C followed by ethanol swelling at 50 °C for 0.5 h.

## References

(1)Wang, Y. Nondestructive Creation of Ordered Nanopores by Selective Swelling of Block Copolymers: Toward Homoporous Membranes. *Acc. Chem. Res.* **2016**, 49, 1401-1408.
